# Supplementary material
Source: MDPI journal article supplement (https://www.mdpi.com/2304-6740/10/10/146)
Supplement: s1 [file s1]

# Synthesis, structural, thermal, and Hirshfeld surface analysis of In(III) tris (N-methyl-N-phenyl dithiocarbamate)

Hela Ferjani<sup>1</sup>, Damian C. Onwudiwe<sup>2,3</sup>

**Table S1.** Fractional atomic coordinates and isotropic or equivalent isotropic displacement parameters (Å<sup>2</sup>).

|            | <i>x</i>     | <i>y</i>     | <i>z</i>     | <i>U</i> <sub>iso</sub> */ <i>U</i> <sub>eq</sub> |
|------------|--------------|--------------|--------------|---------------------------------------------------|
| <b>In1</b> | -0.02270 (2) | 0.68802 (3)  | 0.15580 (2)  | 0.02275 (12)                                      |
| <b>S1</b>  | 0.07453 (9)  | 0.78311 (10) | -0.01197 (9) | 0.0266 (3)                                        |
| <b>S2</b>  | -0.13027 (9) | 0.86419 (10) | 0.04961 (9)  | 0.0252 (3)                                        |
| <b>S3</b>  | -0.13589 (9) | 0.67652 (10) | 0.31926 (9)  | 0.0256 (3)                                        |
| <b>S4</b>  | 0.06313 (9)  | 0.71388 (10) | 0.26633 (9)  | 0.0261 (3)                                        |
| <b>S5</b>  | 0.07573 (9)  | 0.49475 (10) | 0.20586 (10) | 0.0266 (3)                                        |
| <b>S6</b>  | -0.10882 (9) | 0.58524 (10) | 0.11754 (10) | 0.0280 (3)                                        |
| <b>N1</b>  | -0.0407 (3)  | 0.6885 (3)   | 0.4397 (3)   | 0.0242 (9)                                        |
| <b>N2</b>  | -0.0396 (3)  | 0.9562 (3)   | -0.1277 (3)  | 0.0241 (9)                                        |
| <b>N3</b>  | -0.0214 (3)  | 0.3874 (3)   | 0.1777 (3)   | 0.0232 (9)                                        |
| <b>C1</b>  | -0.0324 (3)  | 0.8753 (4)   | -0.0390 (4)  | 0.0227 (10)                                       |
| <b>C2</b>  | -0.0387 (4)  | 0.6926 (4)   | 0.3503 (4)   | 0.0243 (11)                                       |
| <b>C3</b>  | -0.0187 (3)  | 0.4806 (4)   | 0.1673 (3)   | 0.0212 (10)                                       |
| <b>C4</b>  | -0.1302 (4)  | 1.0349 (4)   | -0.1496 (4)  | 0.0326 (13)                                       |
| <b>C5</b>  | -0.1233 (4)  | 0.6672 (5)   | 0.5152 (4)   | 0.0382 (14)                                       |
| <b>C6</b>  | -0.1022 (4)  | 0.3739 (5)   | 0.1457 (5)   | 0.0424 (15)                                       |
| <b>C13</b> | 0.0386 (3)   | 0.9686 (4)   | -0.2065 (4)  | 0.0228 (11)                                       |
| <b>C14</b> | 0.0459 (4)   | 0.9248 (4)   | -0.2705 (4)  | 0.0294 (12)                                       |
| <b>C15</b> | 0.1172 (4)   | 0.9413 (4)   | -0.3502 (4)  | 0.0283 (11)                                       |
| <b>C16</b> | 0.1793 (4)   | 1.0032 (4)   | -0.3670 (4)  | 0.0274 (11)                                       |
| <b>C17</b> | 0.1703 (4)   | 1.0474 (4)   | -0.3026 (4)  | 0.0258 (11)                                       |
| <b>C18</b> | 0.0998 (3)   | 1.0300 (4)   | -0.2218 (4)  | 0.0251 (11)                                       |
| <b>C19</b> | 0.0535 (3)   | 0.2960 (4)   | 0.2212 (4)   | 0.0231 (10)                                       |
| <b>C20</b> | 0.1272 (4)   | 0.2618 (4)   | 0.1602 (4)   | 0.0282 (11)                                       |
| <b>C21</b> | 0.1962 (4)   | 0.1720 (4)   | 0.2028 (4)   | 0.0319 (12)                                       |
| <b>C22</b> | 0.1907 (4)   | 0.1159 (4)   | 0.3032 (4)   | 0.0326 (12)                                       |
| <b>C23</b> | 0.1161 (4)   | 0.1496 (4)   | 0.3639 (4)   | 0.0310 (12)                                       |

|            |             |               |              |              |
|------------|-------------|---------------|--------------|--------------|
| <b>C24</b> | 0.0475 (4)  | 0.2397 (4)    | 0.3225 (4)   | 0.0291 (12)  |
| <b>C25</b> | 0.0423 (3)  | 0.6984 (4)    | 0.4672 (3)   | 0.0212 (10)  |
| <b>C26</b> | 0.0625 (4)  | 0.7957 (4)    | 0.4325 (4)   | 0.0274 (11)  |
| <b>C27</b> | 0.1411 (4)  | 0.8030 (4)    | 0.4606 (4)   | 0.0333 (13)  |
| <b>C28</b> | 0.1986 (4)  | 0.7160 (5)    | 0.5248 (4)   | 0.0372 (13)  |
| <b>C29</b> | 0.1781 (4)  | 0.6203 (5)    | 0.5604 (4)   | 0.0366 (13)  |
| <b>C30</b> | 0.0989 (4)  | 0.6114 (4)    | 0.5324 (4)   | 0.0293 (12)  |
| <b>In2</b> | 0.47645 (2) | 0.16387 (3)   | 0.65457 (2)  | 0.02313 (12) |
| <b>S7</b>  | 0.35653 (9) | 0.09363 (10)  | 0.81209 (9)  | 0.0250 (3)   |
| <b>S8</b>  | 0.55345 (9) | -0.02228 (10) | 0.76913 (10) | 0.0271 (3)   |
| <b>S9</b>  | 0.57842 (9) | 0.17766 (10)  | 0.48689 (9)  | 0.0253 (3)   |
| <b>S10</b> | 0.37774 (9) | 0.14587 (11)  | 0.54664 (9)  | 0.0275 (3)   |
| <b>S11</b> | 0.39644 (9) | 0.35767 (10)  | 0.61295 (10) | 0.0266 (3)   |
| <b>S12</b> | 0.57941 (9) | 0.24118 (10)  | 0.70531 (10) | 0.0262 (3)   |
| <b>N4</b>  | 0.4632 (3)  | 0.2005 (3)    | 0.3634 (3)   | 0.0243 (9)   |
| <b>N5</b>  | 0.5022 (3)  | 0.4403 (3)    | 0.6612 (3)   | 0.0245 (9)   |
| <b>N6</b>  | 0.4424 (3)  | -0.0921 (3)   | 0.9383 (3)   | 0.0237 (9)   |
| <b>C7</b>  | 0.4927 (3)  | 0.3557 (4)    | 0.6593 (3)   | 0.0228 (6)   |
| <b>C8</b>  | 0.3710 (4)  | 0.2066 (5)    | 0.3350 (4)   | 0.0332 (13)  |
| <b>C9</b>  | 0.4310 (4)  | 0.5396 (4)    | 0.6225 (4)   | 0.0320 (12)  |
| <b>C10</b> | 0.3549 (4)  | -0.0910 (4)   | 1.0098 (4)   | 0.0382 (14)  |
| <b>C11</b> | 0.4491 (3)  | -0.0145 (4)   | 0.8492 (4)   | 0.0228 (6)   |
| <b>C12</b> | 0.4723 (3)  | 0.1764 (4)    | 0.4562 (3)   | 0.0228 (6)   |
| <b>C31</b> | 0.5215 (3)  | -0.1820 (4)   | 0.9687 (4)   | 0.0226 (10)  |
| <b>C32</b> | 0.5354 (4)  | -0.2568 (4)   | 0.9348 (4)   | 0.0244 (11)  |
| <b>C33</b> | 0.6128 (4)  | -0.3427 (4)   | 0.9628 (4)   | 0.0269 (11)  |
| <b>C34</b> | 0.6719 (4)  | -0.3544 (4)   | 1.0270 (4)   | 0.0292 (12)  |
| <b>C35</b> | 0.6556 (4)  | -0.2789 (4)   | 1.0620 (4)   | 0.0298 (12)  |
| <b>C36</b> | 0.5807 (4)  | -0.1934 (4)   | 1.0331 (4)   | 0.0288 (12)  |
| <b>C37</b> | 0.5380 (4)  | 0.2362 (4)    | 0.2834 (4)   | 0.0240 (11)  |
| <b>C38</b> | 0.6172 (4)  | 0.1660 (4)    | 0.2642 (4)   | 0.0274 (11)  |
| <b>C39</b> | 0.6858 (4)  | 0.2037 (4)    | 0.1868 (4)   | 0.0300 (12)  |
| <b>C40</b> | 0.6776 (4)  | 0.3087 (4)    | 0.1291 (4)   | 0.0335 (13)  |
| <b>C41</b> | 0.5969 (4)  | 0.3785 (4)    | 0.1479 (4)   | 0.0321 (12)  |
| <b>C42</b> | 0.5264 (4)  | 0.3422 (4)    | 0.2260 (4)   | 0.0277 (11)  |
| <b>C43</b> | 0.5752 (4)  | 0.4372 (4)    | 0.7135 (4)   | 0.0235 (11)  |
| <b>C44</b> | 0.5621 (4)  | 0.3924 (4)    | 0.8164 (4)   | 0.0274 (11)  |

|            |            |            |            |             |
|------------|------------|------------|------------|-------------|
| <b>C45</b> | 0.6278 (4) | 0.3929 (4) | 0.8675 (4) | 0.0295 (12) |
| <b>C46</b> | 0.7056 (4) | 0.4389 (4) | 0.8161 (4) | 0.0329 (13) |
| <b>C47</b> | 0.7164 (4) | 0.4837 (4) | 0.7138 (4) | 0.0341 (13) |
| <b>C48</b> | 0.6512 (4) | 0.4826 (4) | 0.6624 (4) | 0.0285 (12) |

**Table S2.** Selected bond distances (Å) and angles (°) obtained by X-ray diffraction.

| <b>Bond length (Å)</b> |             |         |             |
|------------------------|-------------|---------|-------------|
| In1—S1                 | 2.6033 (13) | In2—S7  | 2.6047 (13) |
| In1—S2                 | 2.6018 (13) | In2—S8  | 2.5668 (13) |
| In1—S3                 | 2.6258 (13) | In2—S9  | 2.6067 (13) |
| In1—S4                 | 2.5561 (14) | In2—S10 | 2.5880 (14) |
| In1—S5                 | 2.6352 (13) | In2—S11 | 2.5980 (13) |
| In1—S6                 | 2.5817 (14) | In2—S12 | 2.5815 (13) |
| S1—C1                  | 1.725 (5)   | S7—C11  | 1.717 (5)   |
| S2—C1                  | 1.716 (5)   | S8—C11  | 1.730 (5)   |
| S3—C2                  | 1.713 (5)   | S9—C12  | 1.730 (5)   |
| S4—C2                  | 1.726 (5)   | S10—C12 | 1.713 (5)   |
| S5—C3                  | 1.727 (5)   | S11—C7  | 1.708 (5)   |
| S6—C3                  | 1.696 (5)   | S12—C7  | 1.737 (5)   |
| N1—C2                  | 1.343 (7)   | N4—C8   | 1.476 (6)   |
| N1—C5                  | 1.461 (6)   | N4—C12  | 1.331 (6)   |
| N1—C25                 | 1.442 (6)   | N4—C37  | 1.449 (6)   |
| N2—C1                  | 1.338 (6)   | N5—C7   | 1.328 (6)   |
| N2—C4                  | 1.465 (6)   | N5—C9   | 1.474 (6)   |
| N2—C13                 | 1.440 (6)   | N5—C43  | 1.460 (6)   |
| N3—C3                  | 1.339 (6)   | N6—C10  | 1.478 (6)   |
| N3—C6                  | 1.479 (7)   | N6—C11  | 1.326 (6)   |
| N3—C19                 | 1.449 (6)   | N6—C31  | 1.445 (6)   |
| C13—C14                | 1.387 (7)   | C31—C32 | 1.387 (7)   |
| C13—C18                | 1.377 (7)   | C31—C36 | 1.383 (7)   |
| C14—C15                | 1.386 (7)   | C32—C33 | 1.395 (7)   |
| C15—C16                | 1.388 (7)   | C33—C34 | 1.380 (8)   |
| C16—C17                | 1.390 (7)   | C34—C35 | 1.402 (8)   |
| C17—C18                | 1.389 (7)   | C35—C36 | 1.371 (7)   |
| C19—C20                | 1.392 (7)   | C37—C38 | 1.385 (7)   |
| C19—C24                | 1.380 (7)   | C37—C42 | 1.387 (7)   |
| C20—C21                | 1.385 (7)   | C38—C39 | 1.375 (7)   |

|                        |            |             |            |
|------------------------|------------|-------------|------------|
| C21—C22                | 1.369 (8)  | C39—C40     | 1.381 (8)  |
| C22—C23                | 1.392 (8)  | C40—C41     | 1.391 (8)  |
| C23—C24                | 1.381 (7)  | C41—C42     | 1.394 (7)  |
| C25—C26                | 1.396 (7)  | C43—C44     | 1.393 (7)  |
| C25—C30                | 1.381 (7)  | C43—C48     | 1.363 (7)  |
| C26—C27                | 1.369 (8)  | C44—C45     | 1.382 (7)  |
| C27—C28                | 1.381 (8)  | C45—C46     | 1.390 (7)  |
| C28—C29                | 1.375 (8)  | C46—C47     | 1.385 (8)  |
| C29—C30                | 1.386 (8)  | C47—C48     | 1.382 (8)  |
| <b>Bond Angles (°)</b> |            |             |            |
| S1—In1—S3              | 154.08 (4) | S7—In2—S9   | 156.95 (4) |
| S1—In1—S5              | 101.07 (4) | S8—In2—S7   | 70.24 (4)  |
| S2—In1—S1              | 69.67 (4)  | S8—In2—S9   | 100.21 (4) |
| S2—In1—S3              | 92.39 (4)  | S8—In2—S10  | 105.54 (5) |
| S2—In1—S5              | 156.78 (5) | S8—In2—S11  | 153.82 (4) |
| S3—In1—S5              | 102.20 (4) | S8—In2—S12  | 92.26 (4)  |
| S4—In1—S1              | 97.67 (4)  | S10—In2—S7  | 92.11 (4)  |
| S4—In1—S2              | 109.61 (4) | S10—In2—S9  | 69.75 (4)  |
| S4—In1—S3              | 70.12 (4)  | S10—In2—S11 | 95.94 (4)  |
| S4—In1—S5              | 92.45 (4)  | S11—In2—S7  | 94.56 (4)  |
| S4—In1—S6              | 153.67 (4) | S11—In2—S9  | 101.18 (4) |
| S6—In1—S1              | 104.01 (5) | S12—In2—S7  | 103.64 (4) |
| S6—In1—S2              | 92.02 (4)  | S12—In2—S9  | 97.53 (4)  |
| S6—In1—S3              | 94.88 (4)  | S12—In2—S10 | 159.50 (4) |
| S6—In1—S5              | 69.04 (4)  | S12—In2—S11 | 70.13 (4)  |
| C1—S1—In1              | 85.15 (16) | C11—S7—In2  | 84.59 (16) |
| C1—S2—In1              | 85.38 (17) | C11—S8—In2  | 85.53 (17) |
| C2—S3—In1              | 83.93 (17) | C12—S9—In2  | 84.39 (16) |
| C2—S4—In1              | 85.87 (18) | C12—S10—In2 | 85.31 (17) |
| C3—S5—In1              | 84.50 (17) | C7—S11—In2  | 85.20 (18) |
| C3—S6—In1              | 86.82 (18) | C7—S12—In2  | 85.16 (17) |
| C2—N1—C5               | 122.0 (5)  | C12—N4—C8   | 121.2 (4)  |
| C2—N1—C25              | 120.8 (4)  | C12—N4—C37  | 121.7 (4)  |
| C25—N1—C5              | 117.1 (4)  | C37—N4—C8   | 116.5 (4)  |
| C1—N2—C4               | 120.6 (4)  | C7—N5—C9    | 121.6 (4)  |
| C1—N2—C13              | 122.4 (4)  | C7—N5—C43   | 122.1 (4)  |
| C13—N2—C4              | 117.0 (4)  | C43—N5—C9   | 115.8 (4)  |

|             |           |             |           |
|-------------|-----------|-------------|-----------|
| C3—N3—C6    | 120.9 (4) | C11—N6—C10  | 122.1 (4) |
| C3—N3—C19   | 121.8 (4) | C11—N6—C31  | 120.6 (4) |
| C19—N3—C6   | 117.3 (4) | C31—N6—C10  | 117.4 (4) |
| S2—C1—S1    | 119.5 (3) | S11—C7—S12  | 119.5 (3) |
| N2—C1—S1    | 121.0 (4) | N5—C7—S11   | 121.1 (4) |
| N2—C1—S2    | 119.5 (4) | N5—C7—S12   | 119.4 (4) |
| S3—C2—S4    | 119.9 (3) | S7—C11—S8   | 119.4 (3) |
| N1—C2—S3    | 120.7 (4) | N6—C11—S7   | 121.3 (4) |
| N1—C2—S4    | 119.4 (4) | N6—C11—S8   | 119.3 (4) |
| S6—C3—S5    | 119.5 (3) | S10—C12—S9  | 119.2 (3) |
| N3—C3—S5    | 120.2 (4) | N4—C12—S9   | 120.7 (4) |
| N3—C3—S6    | 120.3 (4) | N4—C12—S10  | 120.1 (4) |
| C14—C13—N2  | 118.8 (4) | C32—C31—N6  | 119.3 (4) |
| C18—C13—N2  | 119.9 (5) | C36—C31—N6  | 119.6 (5) |
| C18—C13—C14 | 121.1 (5) | C36—C31—C32 | 121.0 (5) |
| C15—C14—C13 | 119.6 (5) | C31—C32—C33 | 119.4 (5) |
| C14—C15—C16 | 120.1 (5) | C34—C33—C32 | 119.7 (5) |
| C15—C16—C17 | 119.5 (5) | C33—C34—C35 | 120.1 (5) |
| C16—C17—C18 | 120.6 (5) | C36—C35—C34 | 120.3 (5) |
| C20—C19—N3  | 119.7 (5) | C38—C37—N4  | 120.6 (4) |
| C24—C19—N3  | 119.7 (4) | C38—C37—C42 | 121.5 (5) |
| C24—C19—C20 | 120.5 (5) | C42—C37—N4  | 117.9 (4) |
| C21—C20—C19 | 119.1 (5) | C39—C38—C37 | 118.4 (5) |
| C22—C21—C20 | 120.7 (5) | C38—C39—C40 | 121.8 (5) |
| C21—C22—C23 | 120.1 (5) | C39—C40—C41 | 119.4 (5) |
| C24—C23—C22 | 119.8 (5) | C40—C41—C42 | 119.9 (5) |
| C19—C24—C23 | 119.8 (5) | C37—C42—C41 | 119.0 (5) |
| C26—C25—N1  | 120.5 (4) | C44—C43—N5  | 118.3 (4) |
| C30—C25—N1  | 119.3 (4) | C48—C43—N5  | 120.5 (5) |
| C30—C25—C26 | 120.2 (5) | C48—C43—C44 | 121.1 (5) |
| C27—C26—C25 | 119.3 (5) | C45—C44—C43 | 119.4 (5) |
| C26—C27—C28 | 120.8 (5) | C44—C45—C46 | 119.9 (5) |
| C29—C28—C27 | 120.1 (5) | C47—C46—C45 | 119.4 (5) |
| C28—C29—C30 | 119.9 (5) | C48—C47—C46 | 120.8 (5) |
| C25—C30—C29 | 119.7 (5) | C43—C48—C47 | 119.3 (5) |
